# Supplementary material for: Deformation of Ordered Mesoporous Silica Structures on Exposure to High Temperatures
Source: Hindawi journal article supplement (doi:10.1155/2014/754076), 2014-01-01
Supplement: f1 [file 754076.f1.pdf]

## Supporting Information

### Deformation of Ordered Mesoporous Silica Structures on Exposure to High Temperatures

J. Lowe, R.T. Baker\*

School of Chemistry, University of St Andrews, St Andrews, Fife, KY16 9ST, United Kingdom

\*Corresponding author: E: [rtb5@st-andrews.ac.uk](mailto:rtb5@st-andrews.ac.uk); T: +44 (0)1334 463899

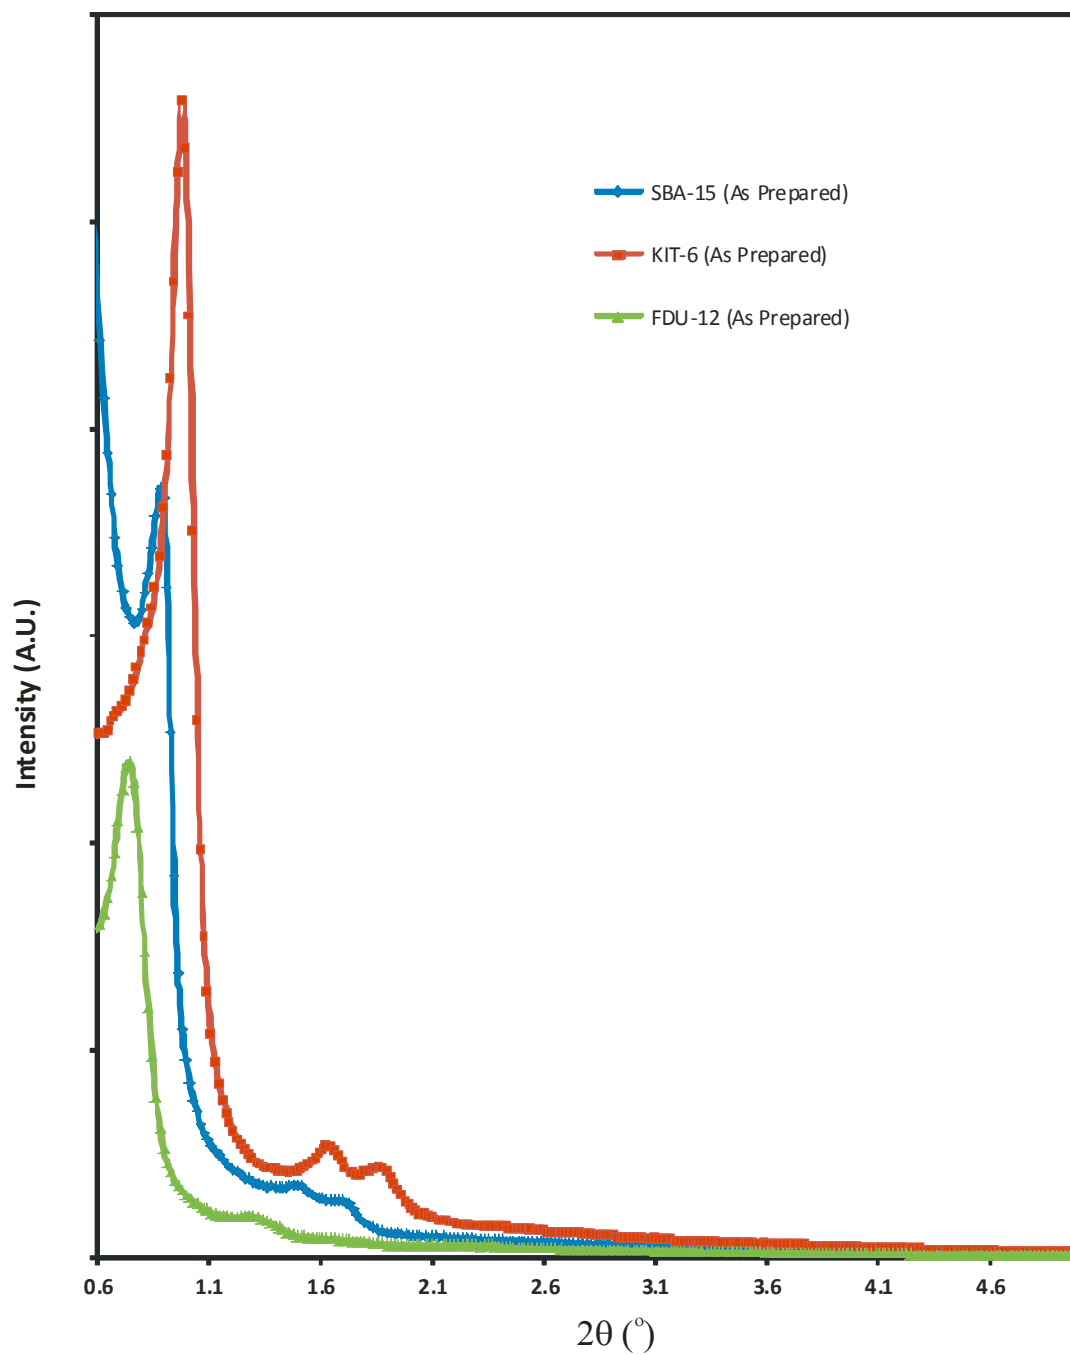

**Figure S1** Small Angle XRD patterns for As-Prepared SBA-15, KIT-6 and FDU-12 Templates.

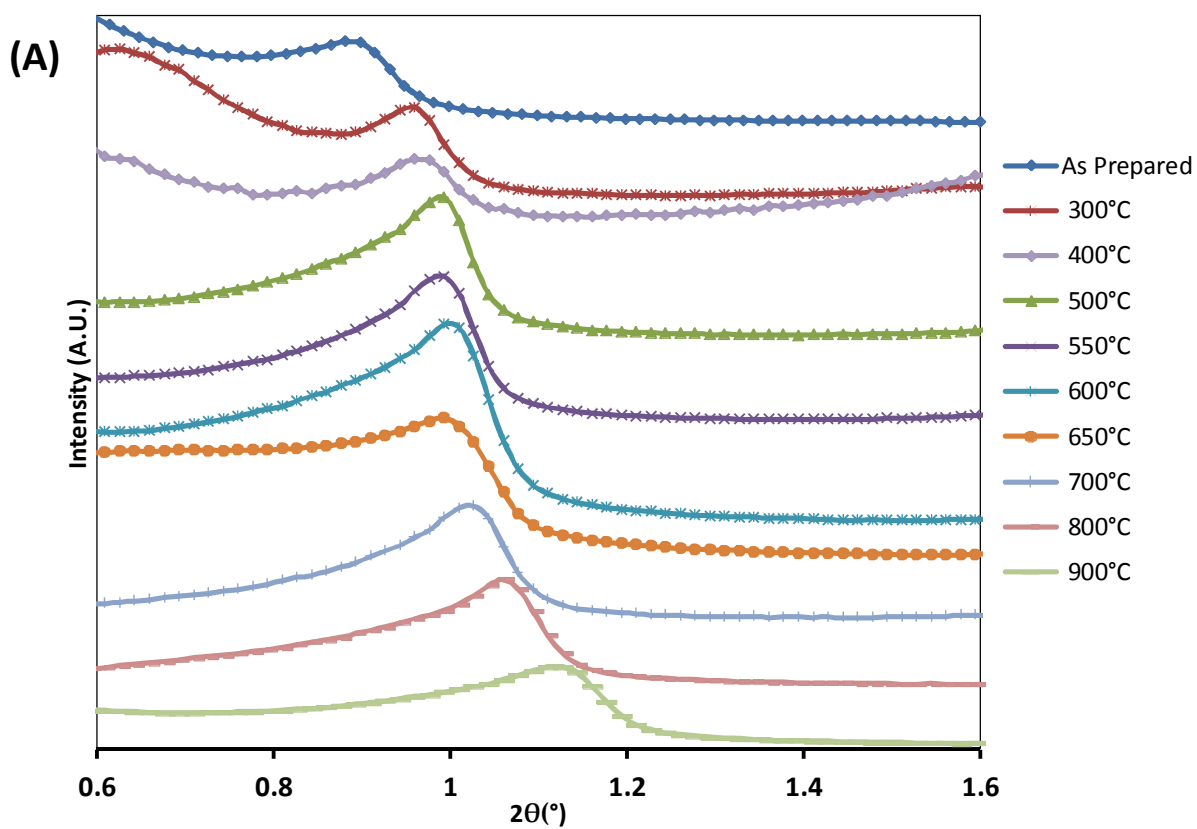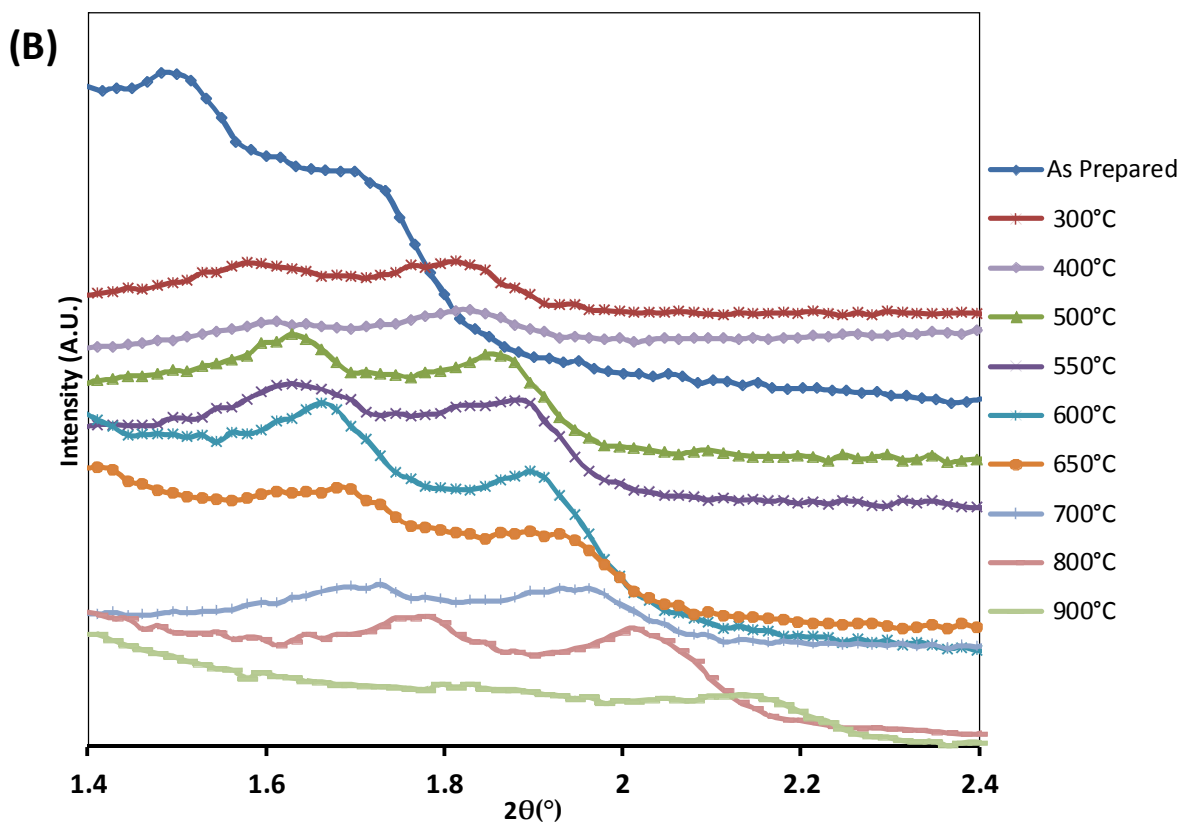

**Figure S2** Small Angle XRD patterns for SBA-15 thermal treatments showing (A) The main peak (100) and (B) the second (111) and third (200) peaks (Intensity multiplied by a factor of 20), Plots are displaced along intensity axis for clarity.

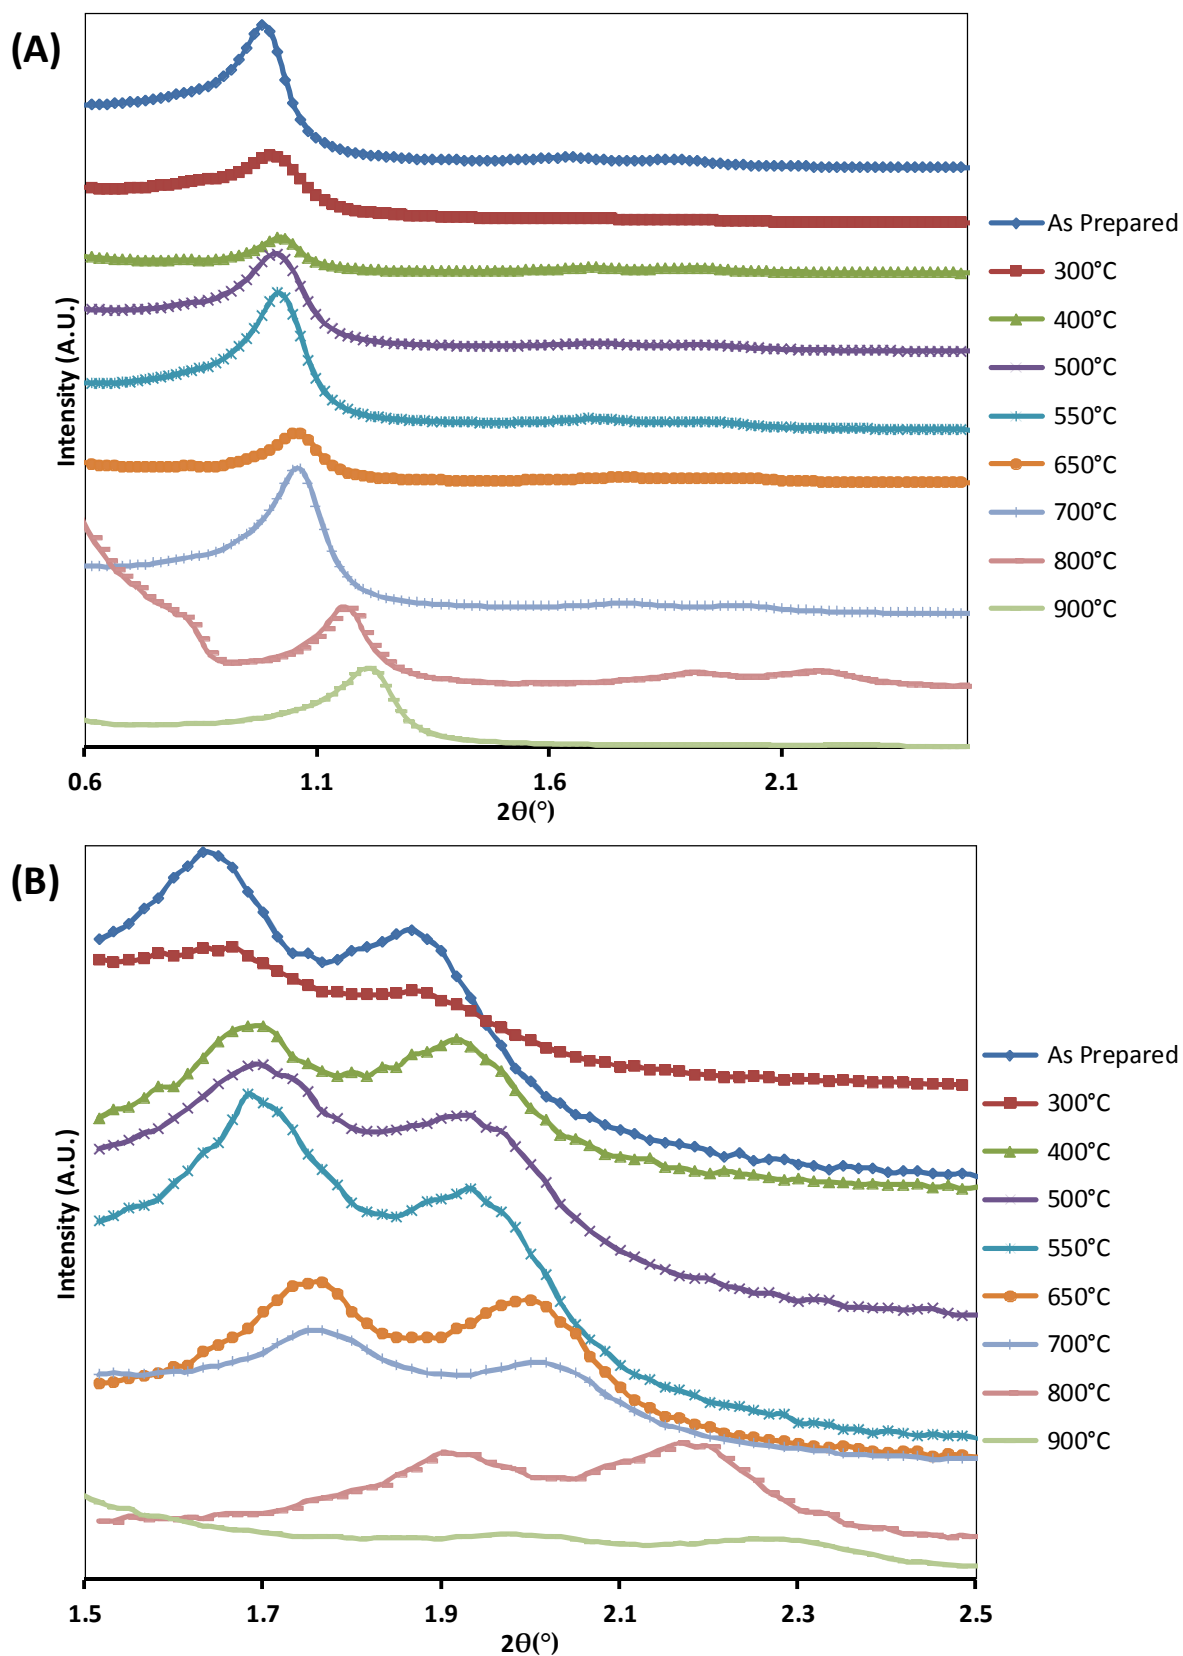

**Figure S3** Small Angle XRD patterns for KIT-6 thermal treatments showing (A) The main peak (211) and (B) the second (400) and third (332) peaks (Intensity multiplied by a factor of 30), Plots are displaced along intensity axis for clarity.

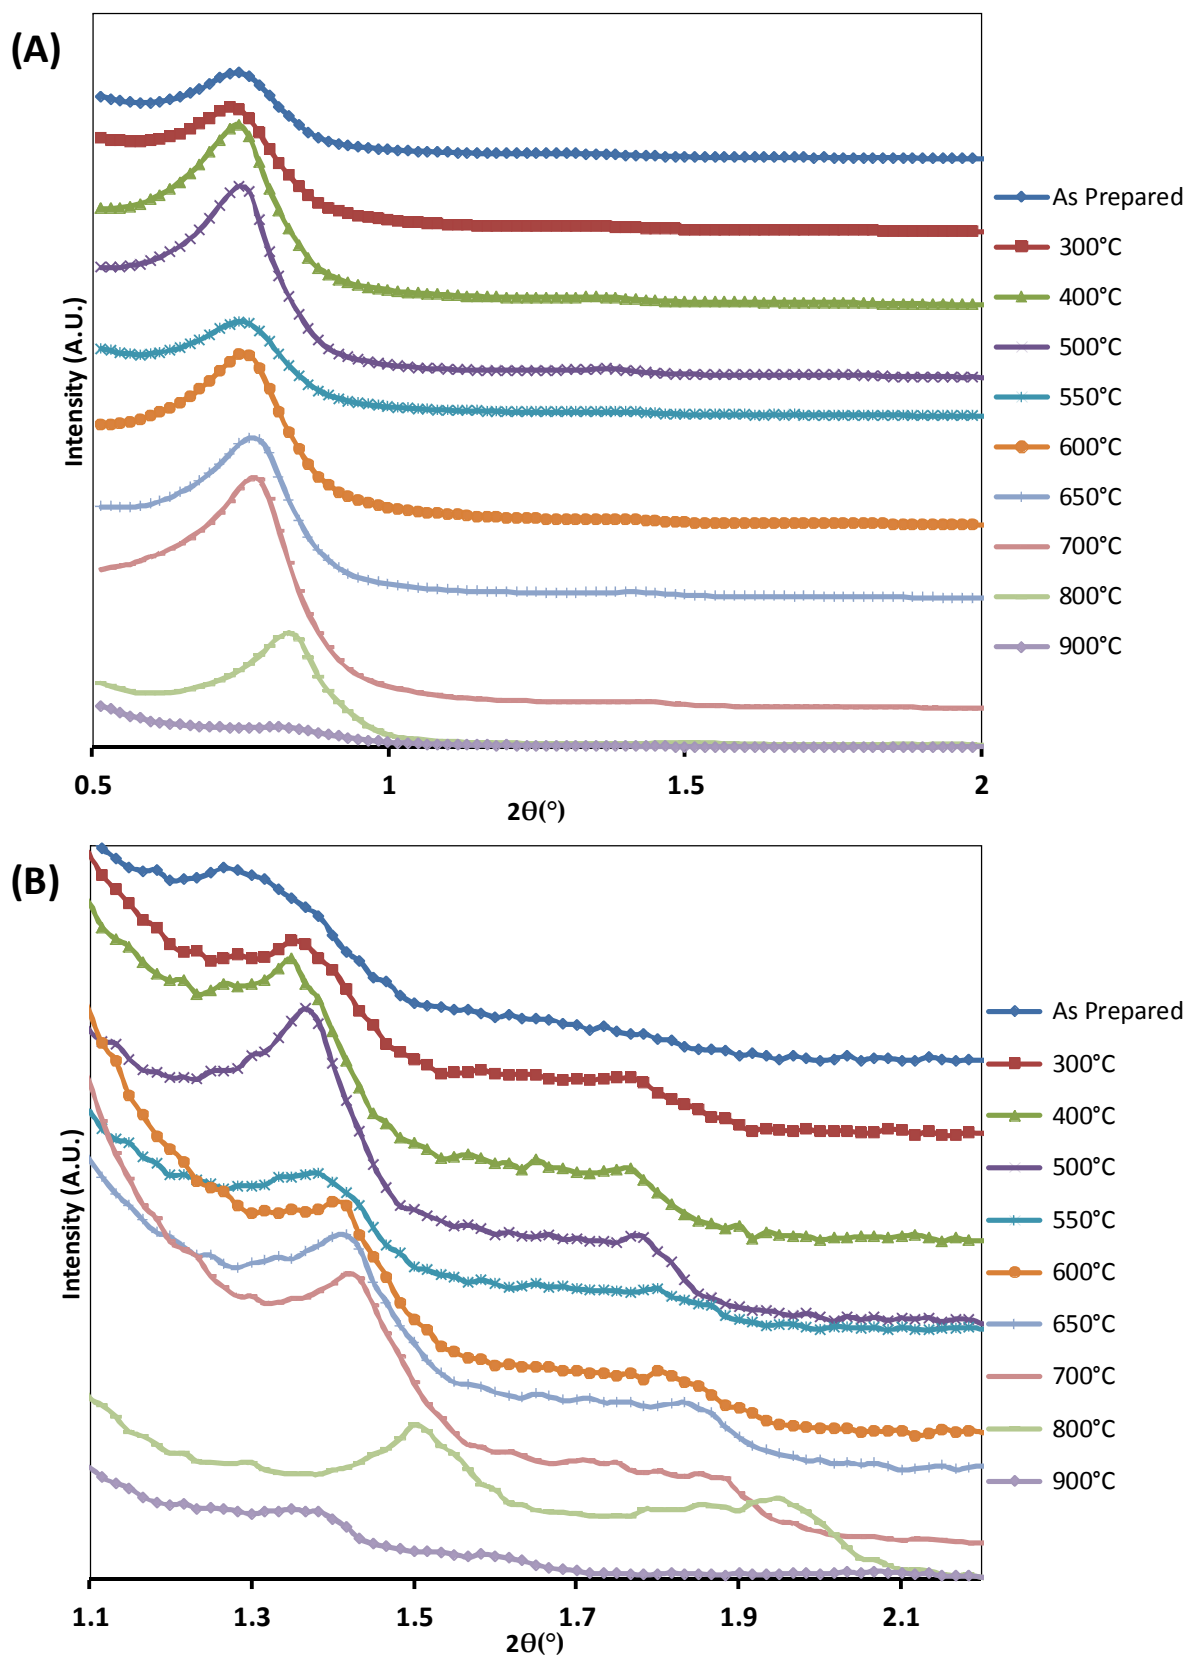

**Figure S4** Small Angle XRD patterns for FDU-12 thermal treatments showing (A) The main peak (111) and (B) the second (220) peak (Intensity multiplied by a factor of 40), Plots are displaced along intensity axis for clarity.
